# Supplementary material for: Two Accessory Proteins Govern MmpL3 Mycolic Acid Transport in Mycobacteria
Source: PubMed Central journal article supplement (PMC6593404; doi:10.1128/mbio.00850-19), 2019-06-25
Supplement: mBio.00850-19-sf001.pdf [file mBio.00850-19-sf001.pdf]

A.

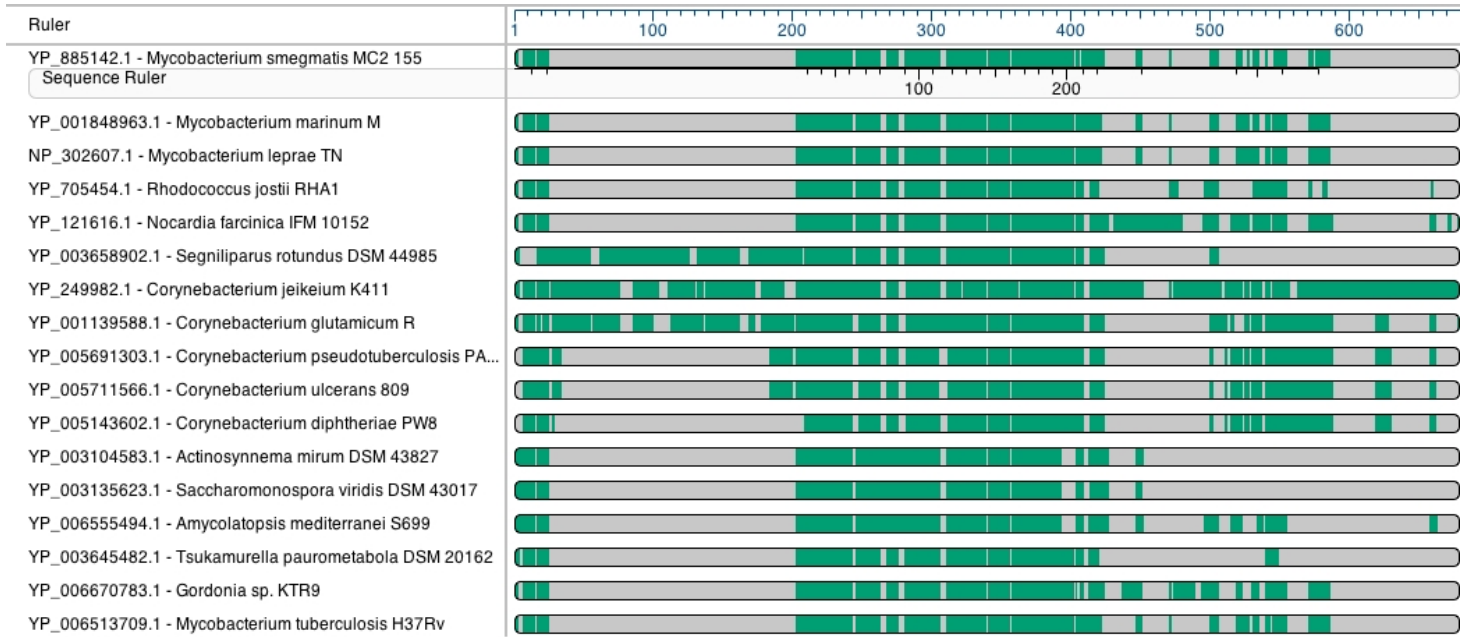

B.

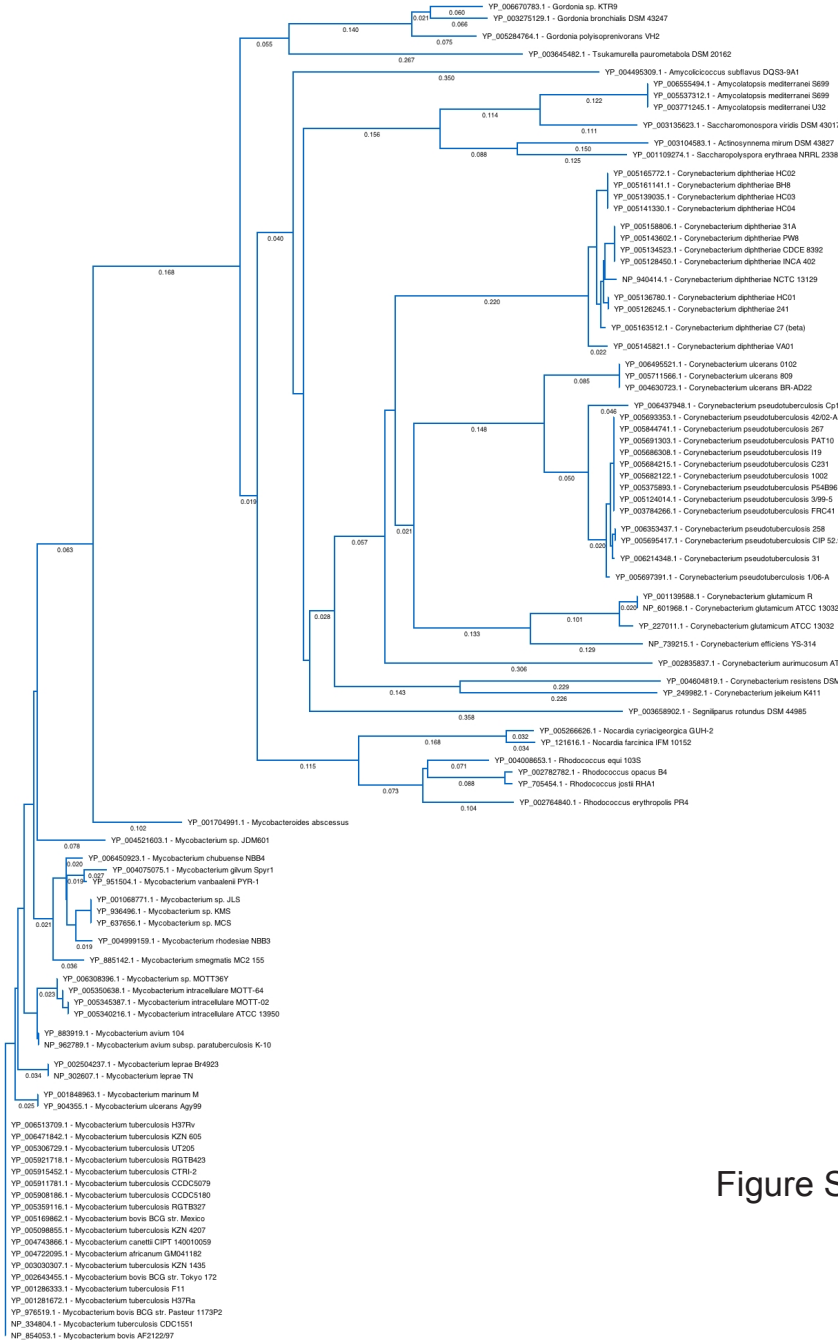

Figure S1
